# Supplementary material for: ESD Reviews: Extreme Weather and Societal Impacts in the Eastern Mediterranean
Source: Copernicus journal article supplement (doi:10.5194/esd-2021-55), 2021-09-09
Supplement: Supplementary file [file esd-2021-55-AC2-supplement.pdf]

**ESD-2021-55:** “ESD Reviews: Extreme Weather and Societal Impacts in the Eastern Mediterranean” by Assaf Hochman, Francesco Marra, Gabriele Messori, Joaquim G. Pinto, Shira Raveh-Rubin, Yizhak Yosef and Georgios Zittis.

**Point by point response to Reviewer 2:**

- 1. Reviewer 2:** This manuscript aims in providing a review on extreme weather and societal impacts over the region of eastern Mediterranean. The authors achieved that by focusing on the physical understanding, observed trends and future projections of the different kinds of extremes that are studying and identifying the major associated societal impacts. It is very well structured and written study begging with an informative and detailed introduction, followed by different sections on temperature, precipitation, wind and compound extreme events that are all accompanied with proper citation. The authors conclude with a summary where knowledge gaps are also mentioned and a last section where they point out some key questions that are still open and need to be studied. The authors also focus in the need of interdisciplinary cross-border collaborative work in order to achieve better understanding of the extremes in the region and hence achieve societal resilience.

**Response:** We would like to thank the anonymous Reviewer for his/her valuable time and positive feedback.
